# Supplementary material for: Strong red-emitting gold nanoclusters protected by glutathione S-transferase
Source: Royal Society of Chemistry journal article supplement (doi:10.1039/c8nr05691a), 2018-01-01
Supplement: c8nr05691a1.pdf [file c8nr05691a1.pdf]

## Strong red-emitting Gold Nanoclusters Protected by Glutathione *S*-transferase

Ding-Yi Fu<sup>a,b</sup>, Ya-Rong Xue<sup>a</sup>, Yongqing Guo<sup>c</sup>, Zhiyu Qu<sup>a</sup>, Hong-Wei Li<sup>a</sup>,  
Hui Wu<sup>c</sup>, Yuqing Wu<sup>a\*</sup>

- a. State Key Laboratory of Supramolecular Structure and Materials, Institute of Theoretical Chemistry, Jilin University, No.2699, Qianjin Street, Changchun, 130012, China.
- b. School of Pharmacy, Nantong University, No. 19 Qixiu Road, Nantong 226001, P. R. China.
- c. National Engineering Laboratory for AIDS Vaccine, School of Life Sciences, Jilin University, Changchun, 130012, China.

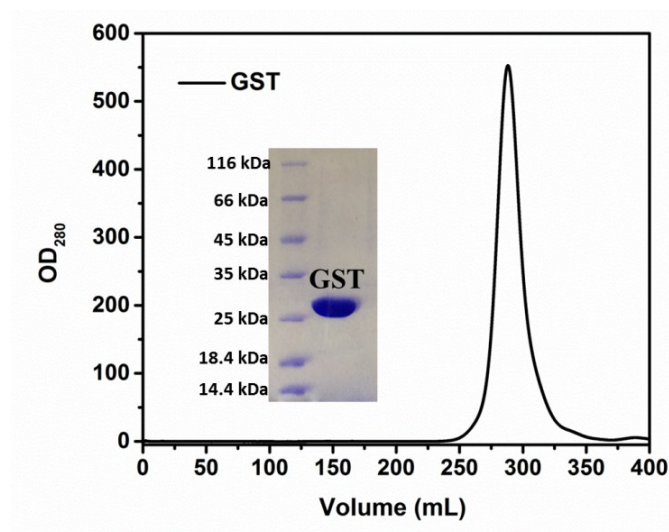

**Fig. S1** FPLC elution profile of GST after purification from a GST affinity column, and the corresponding SDS-PAGE (insert) used to assay the molecular weight of product.

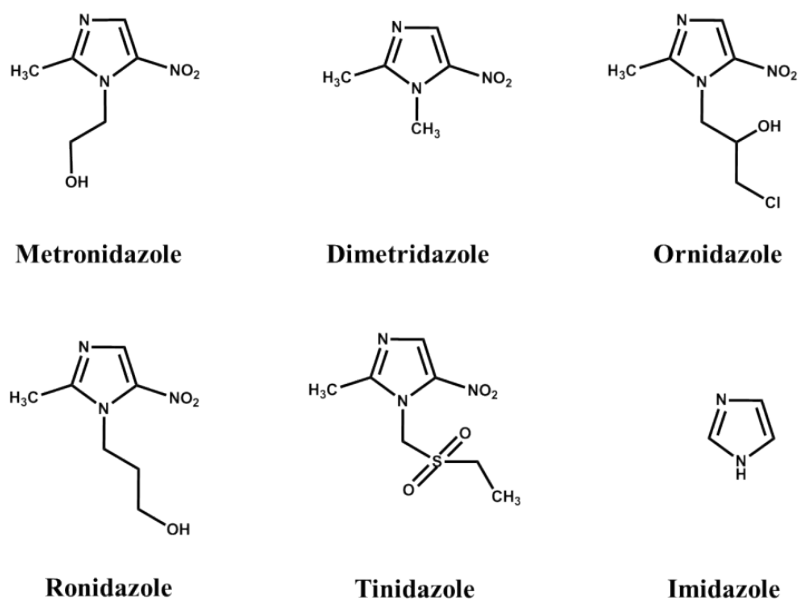

**Fig. S2** The molecular structural formulas of metronidazole (MNZ) and its analogues.

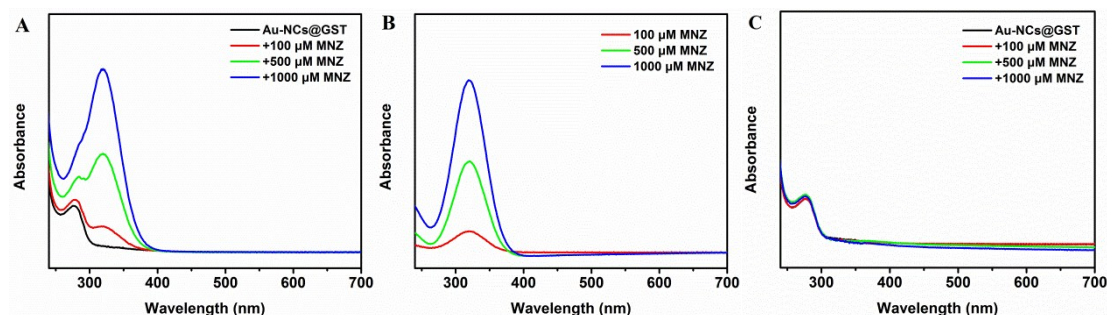

**Fig. S3** UV-vis absorption spectra of (A) Au-NCs@GST (1 mg mL<sup>-1</sup>, black), and those of it in presence of 100 μM (red), 500 μM (green), 1000 μM (blue) MNZ; (B) 100 μM (red), 500 μM (green), 1000 μM (blue) MNZ; (C) Au-NCs@GST (1 mg mL<sup>-1</sup>, black) and different concentration of MNZ, after subtracting the contribution of corresponding MNZ.

**Table S1.** Lifetime and percentage of Au-NCs@GST (0.8 mg mL<sup>-1</sup>) in the absence and presence of different amount of MNZ in PBS solution.

| Lifetimes & percentages           |              | $\tau_1 / \mu\text{s}$ | $a_1$  | $\tau_2 / \mu\text{s}$ | $a_2$  |
|-----------------------------------|--------------|------------------------|--------|------------------------|--------|
| Components                        |              |                        |        |                        |        |
| 0.8 mg mL <sup>-1</sup> Au-NC@GST |              | 0.62                   | 20.66% | 1.96                   | 79.34% |
| 0.8 mg mL <sup>-1</sup> Au-NC@GST | +100 μM MNZ  | 0.65                   | 25.36% | 1.74                   | 74.64% |
|                                   | +500 μM MNZ  | 0.52                   | 26.91% | 1.51                   | 73.09% |
|                                   | +1000 μM MNZ | 0.49                   | 25.87% | 1.25                   | 74.13% |
